# Supplementary material for: Surfactant-assisted assembly of nanoscale zinc coordination compounds to enhance tandem conversion reactions in water
Source: Royal Society of Chemistry journal article supplement (doi:10.1039/c9dt03145f), 2019-01-01
Supplement: c9dt03145f1.pdf [file c9dt03145f1.pdf]

## Supporting Information

### Surfactant-assisted Assembly of Nanoscale Zinc Coordination Compounds to Enhance Tandem Conversion Reactions in Water

Chao Huang,<sup>†</sup> Kaifang Zhu,<sup>†</sup> Yingying Zhang,<sup>†</sup> Guizhen Lu,<sup>†</sup> Kuan Gao,<sup>‡</sup> Zhichao Shao,<sup>‡</sup> Liwei Mi,<sup>\*,†</sup> and Hongwei Hou<sup>\*,‡</sup>

<sup>†</sup> Center for Advanced Materials Research, Zhongyuan University of Technology, Zhengzhou 450007, P. R. China.

<sup>‡</sup> College of Chemistry and Molecular Engineering, Zhengzhou University, Zhengzhou 450001, P. R. China.

#### Contents

|                                                                                                                                                                                                   |     |
|---------------------------------------------------------------------------------------------------------------------------------------------------------------------------------------------------|-----|
| 1. General methods .....                                                                                                                                                                          | S2  |
| 2. Synthesis.....                                                                                                                                                                                 | S3  |
| 3. Procedure for the nanoscale 1 and 2-catalyzed Conversion of nitrobenzyl compounds into benzoic acids frameworks.....                                                                           | S5  |
| 4. Crystal Data Collection and Refinement.....                                                                                                                                                    | S8  |
| 5. Additional structure figures and characterizations of 1-2.....                                                                                                                                 | S11 |
| 6. Optimization of reaction conditions for the conversion of nitromethylbenzene into benzoic acid.....                                                                                            | S15 |
| 7. Conversion of nitrobenzyl compounds into benzoic acids frameworks catalyzed by large size of 1-2, Zn(NO <sub>3</sub> ) <sub>2</sub> /H <sub>3</sub> idbt and H <sub>3</sub> idbt in water..... | S17 |
| 8. Recycling test for halogenation reactions with 1-2.....                                                                                                                                        | S19 |
| 9. A plausible mechanism for the conversion of nitroalkanes into carboxylic acids.....                                                                                                            | S21 |
| 10. Spectral copies of <sup>1</sup> H NMR of compounds obtained in this study.....                                                                                                                | S22 |
| 11. References.....                                                                                                                                                                               | S28 |



**1. General Method.** 5,5'-(1H-imidazole-4,5-diyl)-bis-(2H-tetrazole) ( $H_3idbt$ ) was synthesized according to a modified procedure from the literature.<sup>1</sup> The reagents and solvents were commercially available and used as received without further purification.  $^1H$  spectra were obtained with Bruker Avance-400 spectrometers. FT-IR spectra were recorded on a Bruker-ALPHA spectrophotometer with KBr pellets in 400-4000  $cm^{-1}$  region. Elemental analyses (C, H, and N) were carried out on a FLASH EA 1112 elemental analyzer. X-ray photoelectron spectroscopy (XPS) determination was measured in an ESCALAB 250Xi-type instrument. Inductively coupled plasma atomic emission spectrometry (ICP-AES) analyses were carried out on a Thermo Scientific ICP 6000 spectrometry. Powder X-ray diffraction (PXRD) patterns were recorded using  $Cu\ K\alpha_1$  radiation on a PANalyticalX'Pert PRO diffractometer. Thermal analyses were performed on a Netzsch STA 449C thermal analyzer at a heating rate of 10  $^{\circ}C\cdot min^{-1}$  in air.

## 2. Synthesis

**Synthesis of H<sub>3</sub>idbt ligand.** A mixture of 4,5-dicyanoimidazole (4.00 g, 34.0 mmol), NaN<sub>3</sub> (13.20 g, 204 mmol), and triethylamine hydrochloride (49.4 g, 204 mmol) in 180 mL of toluene and 60 mL of methanol was heated at reflux in a 500 mL round-bottom flask for 3 days. Upon cooling to room temperature, an aqueous solution of NaOH (1 M, 300 mL) was added, and the mixture was stirred for 1 h. The aqueous layer was treated with dilute HCl (1 M, 350 mL) until no further white precipitate formed. The precipitate was then collected by filtration, and dissolved in aqueous NaOH (1 M). The resulting clear, colorless solution was titrated with dilute HCl (1 M) until the pH of the solution was approximately 3. The ensuing white precipitate was washed copiously with distilled water (1000 mL) and dried in air to afford 7.06 g (94 %) of product. <sup>1</sup>H NMR (400 MHz, d<sub>6</sub>-DMSO)  $\delta$ : 8.28 (s, 1H). ESI-TOF/MS for C<sub>5</sub>H<sub>4</sub>N<sub>10</sub>: calcd. 204.06, found 203.35 [M-H].

**Synthesis of {[Zn<sub>3</sub>(idbt)<sub>2</sub>(4,4'-dmbpy)<sub>2</sub>]·H<sub>2</sub>O}<sub>n</sub> (1).** Zn(NO<sub>3</sub>)<sub>2</sub>·6H<sub>2</sub>O (0.030 g, 0.1 mmol), H<sub>3</sub>idbt (0.02 g, 0.1 mmol), 4,4'-dmbpy (4,4'-dmbpy = 4,4'-dimethyl-2,2'-bipyridine, 0.018g, 0.1 mmol), DMF (3 mL) and H<sub>2</sub>O (5 mL) were mixed and placed in a 25 mL a Teflon-lined autoclave. The mixture was heated at 160 °C for three days, and colorless crystals of **1** were obtained with a yield of 65 % (based on Zn). Anal. calcd for C<sub>34</sub>H<sub>28</sub>Zn<sub>3</sub>N<sub>24</sub>O: C, 41.46 %; H, 2.87 %; N, 34.13 %. Found: C, 41.48 %; H, 2.85 %; N, 34.15 %. IR (KBr, cm<sup>-1</sup>): 3443 (s), 3062 (w), 2172 (w), 2108 (vs), 1981 (vw), 1653 (vs), 1459 (m), 1409 (s), 1135 (m), 1026 (m), 916 (w), 874 (vw), 761 (m), 728 (w).

**Synthesis of {[Zn<sub>3</sub>(idbt)<sub>2</sub>(H<sub>2</sub>O)<sub>3</sub>]·H<sub>2</sub>O}<sub>n</sub> (2).** Zn(NO<sub>3</sub>)<sub>2</sub>·6H<sub>2</sub>O (0.030 g, 0.1 mmol), H<sub>3</sub>idbt (0.01 g, 0.05 mmol), NH<sub>3</sub>·H<sub>2</sub>O (4 mL) and EtOH (4 mL) were mixed and placed in a 25 mL a Teflon-lined autoclave. The mixture was heated at 180 °C for three days, and the colorless crystals of **2** were obtained with a yield of 54 % (based on Zn). Anal. calcd for C<sub>10</sub>H<sub>10</sub>Zn<sub>3</sub>N<sub>20</sub>O<sub>4</sub>: C, 17.91 %; H, 1.50 %; N, 41.78 %. Found: C, 17.93 %; H, 1.49 %; N, 41.76 %. IR (KBr, cm<sup>-1</sup>): 3423 (s), 3061 (w), 2162 (w), 2115 (vs), 1976 (vw), 1636 (vs), 1440 (s), 1440 (s), 1245 (m), 1021 (w), 982 (vw), 874 (w), 763 (m), 722 (w).

**Synthesis of nanocrystals of 1 with PVA.** A mixture of Zn(NO<sub>3</sub>)<sub>2</sub>·6H<sub>2</sub>O (0.059 g, 0.2 mmol), poly(vinyl alcohol) (PVA, 1788, 0.150 g), and H<sub>2</sub>O (5 mL) was sonicated for 20 min. A solution of DMF (3 mL), H<sub>3</sub>idbt (0.04 g, 0.2 mmol) and 4,4'-dmbpy (0.036g, 0.2 mmol) was added to the mixture of PVA/H<sub>2</sub>O and sonicated for another 30 min. Then, the solution was transferred to Teflon-lined stainless-steel container to afford crystal

growth at 160 °C for three days. After cooling, the nanocrystals were achieved by centrifugation at 10000 rpm for 15 min. The nanocrystals of **1** were washed by sonication after being redispersed in EtOH.

**Synthesis of nanocrystals of 2 with PVA.** A mixture of  $\text{Zn}(\text{NO}_3)_2 \cdot 6\text{H}_2\text{O}$  (0.059 g, 0.2 mmol), PVA (0.150 g), and EtOH (4 mL) was sonicated for 20 min. A solution of  $\text{NH}_3 \cdot \text{H}_2\text{O}$  (4 mL) and  $\text{H}_3\text{idbt}$  (0.02 g, 0.1 mmol) was added to the mixture of PVA/EtOH and sonicated for another 30 min. Then, the solution was heated at 180 °C for three days. After cooling, the nanocrystals were achieved by centrifugation at 10000 rpm for 15 min. The nanocrystals of **2** were washed by sonication after being re-dispersed in EtOH.

### 3. Procedure for the nanoscale **1** and **2**-catalyzed conversion of nitrobenzyl compounds into benzoic acids frameworks

To a solution of water (10 mL) charged with nitroalkane (1.0 mmol) and TBAI (0.05 mmol) was added nanoscale **1** or **2** (0.1 mmol, 0.1 equiv based on zinc ions). The resulting mixture was stirred at 80 °C and monitored by TLC. After the completion of the reaction (approximately 15 h), the mixture was cooled to room temperature and acidified with 2 M HCl. The acidic solution was washed with dichloromethane. The organic phases were collected and washed with a saturated solution of sodium bicarbonate. The aqueous washes were acidified with HCl<sub>conc</sub> and washed with dichloromethane. The organic layers were collected and concentrated under reduced pressure

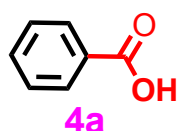

**Benzoic acid:** Following the general procedure described above, benzoic acid was obtained as a white solid (100.4 mg, 82% for nanoscale **1**; 114.7 mg, 94% for nanoscale **2**). This compound had been reported.<sup>2</sup> <sup>1</sup>H NMR (400 MHz, d<sub>6</sub>-DMSO)  $\delta$ : 13.02 (s, 1H), 7.99-8.02 (m, 2H), 7.62-7.67 (m, 1H), 7.51-7.55 (m, 2H).

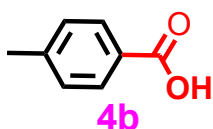

**4-Methylbenzoic acid:** Following the general procedure described above, benzoic acid was obtained as a white solid (111.5 mg, 82 % for nanoscale **1**; 127.8 mg, 94 % for nanoscale **2**). This compound had been reported.<sup>2</sup> <sup>1</sup>H NMR (400 MHz, d<sub>6</sub>-DMSO)  $\delta$ : 12.85 (s, 1H), 7.87 (d,  $J$  = 8.0 Hz, 2H), 7.31 (d,  $J$  = 8.0 Hz, 2H), 2.37 (s, 3H).

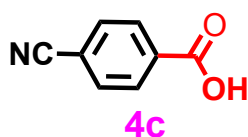

**4-Cyanobenzoic acid:** Following the general procedure described above, benzoic acid was obtained as a white solid (119.0 mg, 81 % for nanoscale **1**; 136.7 mg, 93 % for nanoscale **2**). This compound had been reported.<sup>2</sup> <sup>1</sup>H NMR (400 MHz, d<sub>6</sub>-DMSO)  $\delta$ : 13.62 (s, 1H), 8.09 (d,  $J$  = 8.0 Hz, 2H), 7.99 (d,  $J$  = 8.0 Hz, 2H).

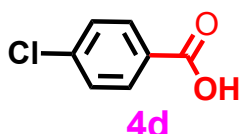

**4-Chlorobenzoic acid:** Following the general procedure described above, benzoic acid was obtained as a white

solid (124.8 mg, 80 % for nanosacle **1**; 145.1 mg, 93 % for nanosacle **2**). This compound had been reported.<sup>2</sup> <sup>1</sup>H NMR (400 MHz, d<sub>6</sub>-DMSO)  $\delta$ : 13.27 (s, 1H), 7.95 (d,  $J$  = 8.0 Hz, 2H), 7.58 (d,  $J$  = 8.0 Hz, 2H).

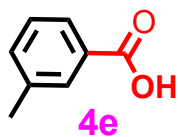

**3-Methylbenzoic acid:** Following the general procedure described above, benzoic acid was obtained as a white solid (106.1 mg, 78 % for nanosacle **1**; 115.9 mg, 92 % for nanosacle **2**). <sup>1</sup>H NMR (400 MHz, d<sub>6</sub>-DMSO)  $\delta$ : 12.91 (s, 1H), 7.75-7.78 (m, 2H), 7.37-7.45 (m, 2H), 2.37 (s, 3H).

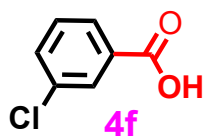

**3-Chlorobenzoic acid:** Following the general procedure described above, benzoic acid was obtained as a white solid (120.1 mg, 77 % for nanosacle **1**; 142.0 mg, 91 % for nanosacle **2**). This compound had been reported.<sup>2</sup> <sup>1</sup>H NMR (400 MHz, d<sub>6</sub>-DMSO)  $\delta$ : 13.36 (s, 1H), 7.90-7.92 (m, 2H), 7.70-7.73 (m, 1H), 7.54-7.58 (m, 1H).

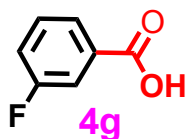

**3-Fluorobenzoic acid:** Following the general procedure described above, benzoic acid was obtained as a white solid (106.4 mg, 76 % for nanosacle **1**; 127.4 mg, 91 % for nanosacle **2**). This compound had been reported.<sup>2</sup> <sup>1</sup>H NMR (400 MHz, d<sub>6</sub>-DMSO)  $\delta$ : 13.33 (s, 1H), 7.79-7.82 (m, 1H), 7.65-7.69 (m, 1H), 7.55-7.61 (m, 1H), 7.47-7.53 (m, 1H).

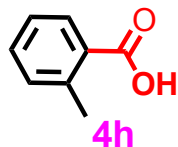

**2-Methylbenzoic acid:** Following the general procedure described above, benzoic acid was obtained as a white solid (99.3 mg, 76 % for nanosacle **1**; 122.4 mg, 90 % for nanosacle **2**). This compound had been reported.<sup>2</sup> <sup>1</sup>H NMR (400 MHz, d<sub>6</sub>-DMSO)  $\delta$ : 12.81 (s, 1H), 7.82 (d,  $J$  = 8.0 Hz, 1H), 7.43-7.47 (m, 1H), 7.27-7.31 (m, 2H), 2.51 (s, 3H).

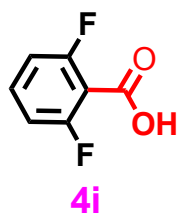

**2,6-Difluorobenzoic acid:** Following the general procedure described above, benzoic acid was obtained as a white solid (112.2 mg, 71 % for nanosacle **1**; 139.0 mg, 88 % for nanosacle **2**). This compound had been reported.<sup>2</sup> <sup>1</sup>H NMR (400 MHz, d<sub>6</sub>-DMSO)  $\delta$ : 7.55-7.64 (m, 1H), 7.19-7.25 (m, 2H).

**4. Crystal Data Collection and Refinement.** The data for **1-2** were collected on a Rigaku Saturn 724 CCD diffractometer (Mo-K $\alpha$ ,  $\lambda = 0.71073$ ) at room temperature, respectively. Absorption corrections were applied by using numerical program. The detailed structures were solved by direct ways and refined by full-matrix least-squares on  $F^2$  with the SHELXL.<sup>3,4</sup> All hydrogen atoms expect for H<sub>2</sub>O molecule were placed at geometrically calculated positions, and refined by riding. There are large solvent accessible void volumes in the samples of **2** which are occupied by highly disordered free water molecules. No satisfactory disorder model could be achieved, and therefore the SQUEEZE program implemented in PLATON was used to remove these electron densities.<sup>5</sup> The number of solvent molecules were obtained by element analyses and TGA. The crystal data of **1-2** are summarized in Table S1 and S2. The crystal data have been deposited at the Cambridge Crystallographic Data Centre with CCDC reference number 1943115 and 1944008, respectively.

**Table S1.** Crystallographic data and structure refinement details for complexes **1-2**<sup>a,b</sup>

| Complex                                        | <b>1</b>                                                          | <b>2</b>                                                                       |
|------------------------------------------------|-------------------------------------------------------------------|--------------------------------------------------------------------------------|
| Formula                                        | C <sub>34</sub> H <sub>28</sub> Zn <sub>3</sub> N <sub>24</sub> O | C <sub>10</sub> H <sub>10</sub> Zn <sub>3</sub> N <sub>20</sub> O <sub>4</sub> |
| fw                                             | 984.91                                                            | 670.49                                                                         |
| T/K                                            | 293(2)                                                            | 293(2)                                                                         |
| $\lambda$ (Mo K), Å                            | 0.71073                                                           | 0.71073                                                                        |
| Crystal system                                 | Monoclinic                                                        | Monoclinic                                                                     |
| Space group                                    | $P2_1/n$                                                          | $C2/c$                                                                         |
| a (Å)                                          | 15.061(3)                                                         | 20.348(4)                                                                      |
| b (Å)                                          | 18.967(4)                                                         | 12.590(3)                                                                      |
| c (Å)                                          | 17.270(4)                                                         | 19.354(4)                                                                      |
| $\beta$ (°)                                    | 107.86(3)                                                         | 117.33(3)                                                                      |
| V (Å <sup>3</sup> )                            | 4695.6(18)                                                        | 4404.6(19)                                                                     |
| Z                                              | 4                                                                 | 8                                                                              |
| $D_{\text{calcd.}}$ (g·cm <sup>-3</sup> )      | 1.393                                                             | 2.022                                                                          |
| <i>Reflections</i><br><i>collected /unique</i> | 32230 / 8730                                                      | 16809 / 4106                                                                   |
| abs coeff/mm <sup>-1</sup>                     | 1.575                                                             | 3.310                                                                          |
| $F(000)$                                       | 1992                                                              | 2656                                                                           |
| $\theta$ (°)                                   | 1.51-25.50                                                        | 1.97-25.50                                                                     |
| GOF                                            | 1.067                                                             | 1.138                                                                          |
| $R_I(I > 2\sigma(I))^a$                        | 0.0588                                                            | 0.0495                                                                         |
| $wR_2(I > 2\sigma(I))^b$                       | 0.1176                                                            | 0.0912                                                                         |

$$^a R_1 = \sum |F_o| - |F_c| / \sum |F_o|, \quad ^b wR_2 = [\sum w(F_o^2 - F_c^2)^2 / \sum w(F_o^2)^2]^{1/2}.$$

**Table S2.** Selected Bond Lengths (Å) and Bond Angles (deg) for **1-2**, and **2a**

| Complex 1     |            |              |            |
|---------------|------------|--------------|------------|
| Zn1-N4#1      | 2.219(4)   | Zn2-N16      | 2.002(4)   |
| Zn1-N5#1      | 2.119(4)   | Zn2-N19      | 1.985(4)   |
| Zn1-N18       | 2.122(4)   | Zn3-N6       | 2.058(4)   |
| Zn1-N22       | 2.225(4)   | Zn3-N10      | 2.307(4)   |
| Zn1-N23       | 2.167(4)   | Zn3-N11      | 2.192(4)   |
| Zn1-N24       | 2.113(4)   | Zn3-N12      | 2.118(4)   |
| Zn2-N1#2      | 2.005(4)   | Zn3-N13      | 2.273(4)   |
| Zn2-N7#2      | 1.993(4)   | Zn3-N17      | 2.125(4)   |
| N4#1-Zn1-N2#2 | 93.43(14)  | N19-Zn2-N1#2 | 105.34(16) |
| N5#1-Zn1-N4#1 | 78.13(14)  | N19-Zn2-N7#2 | 117.79(16) |
| N5#1-Zn1-N18  | 93.76(14)  | N19-Zn2-N16  | 106.17(15) |
| N5#1-Zn1-N22  | 90.97(15)  | N6-Zn3-N10   | 76.93(14)  |
| N5#1-Zn1-N23  | 93.13(15)  | N6-Zn3-N11   | 97.71(15)  |
| N18-Zn1-N4#1  | 167.70(14) | N6-Zn3-N12   | 165.79(15) |
| N18-Zn1-N22   | 77.32(14)  | N6-Zn3-N13   | 96.28(15)  |
| N18-Zn1-N23   | 93.48(14)  | N6-Zn3-N17   | 95.62(14)  |
| N23-Zn1-N4#1  | 96.16(14)  | N11-Zn3-N10  | 104.53(15) |
| N23-Zn1-N22   | 170.17(14) | N11-Zn3-N13  | 158.43(14) |
| N24-Zn1-N4#1  | 98.50(14)  | N12-Zn3-N10  | 92.49(15)  |
| N24-Zn1-N5#1  | 168.81(14) | N12-Zn3-N11  | 75.54(16)  |
| N24-Zn1-N18   | 91.16(14)  | N12-Zn3-N13  | 93.97(16)  |
| N24-Zn1-N22   | 99.92(15)  | N12-Zn3-N17  | 96.34(15)  |
| N24-Zn1-N23   | 76.53(15)  | N13-Zn3-N10  | 94.54(15)  |
| N7#2-Zn2-N12  | 104.94(15) | N17-Zn3-N10  | 167.67(15) |
| N7#2-Zn2-N16  | 110.02(16) | N17-Zn3-N11  | 86.05(14)  |
| N16-Zn2-N1#2  | 112.65(16) | N17-Zn3-N13  | 76.33(14)  |
| Complex 2     |            |              |            |

|              |            |             |            |
|--------------|------------|-------------|------------|
| Zn1-O1       | 2.037(5)   | Zn2-N17     | 1.999(3)   |
| Zn1-N6       | 2.060(4)   | Zn3-O2      | 2.002(5)   |
| Zn1-N7       | 2.015(3)   | Zn3-N2      | 2.119(4)   |
| Zn1-N12#1    | 2.007(4)   | Zn3-N10     | 2.134(4)   |
| Zn2-O3       | 2.030(5)   | Zn3-N11     | 2.153(4)   |
| Zn2-N12      | 1.997(4)   | Zn3-N20     | 2.110(3)   |
| Zn2-N16      | 2.101(4)   | N17-Zn2-N16 | 99.00(14)  |
| O1-Zn1-N6    | 97.8(2)    | O2-Zn3-N2   | 102.95(17) |
| N7-Zn1-O1    | 111.6(2)   | O2-Zn3-N10  | 110.67(17) |
| N7-Zn1-N6    | 99.21(14)  | O2-Zn3-N11  | 104.29(17) |
| N12#1-Zn1-O1 | 111.63(19) | O2-Zn3-N20  | 108.32(17) |
| N12#1-Zn1-N6 | 101.20(15) | N2-Zn3-N10  | 76.93(14)  |
| N12#1-Zn1-N7 | 128.59(16) | N2-Zn3-N11  | 152.69(16) |
| O3-Zn2-N16   | 100.2(2)   | N10-Zn3-N11 | 95.14(14)  |
| N1#2-Zn2-O3  | 106.9(2)   | N20-Zn3-N2  | 92.95(14)  |
| N1#2-Zn2-N16 | 101.24(15) | N20-Zn3-N10 | 140.98(16) |
| N1#2-Zn2-N17 | 130.39(16) |             |            |

---

Symmetry codes for **1**: #1 = 2-x, 2-y, 1-z; #2 = 5/2-x, 1/2+y, 3/2-z. Symmetry codes for **2**: #1 = x, -y, 1/2+z; #2 = x, 1-y, -1/2+z.

---

## 5. Additional structure figures and characterizations of complexes 1-2

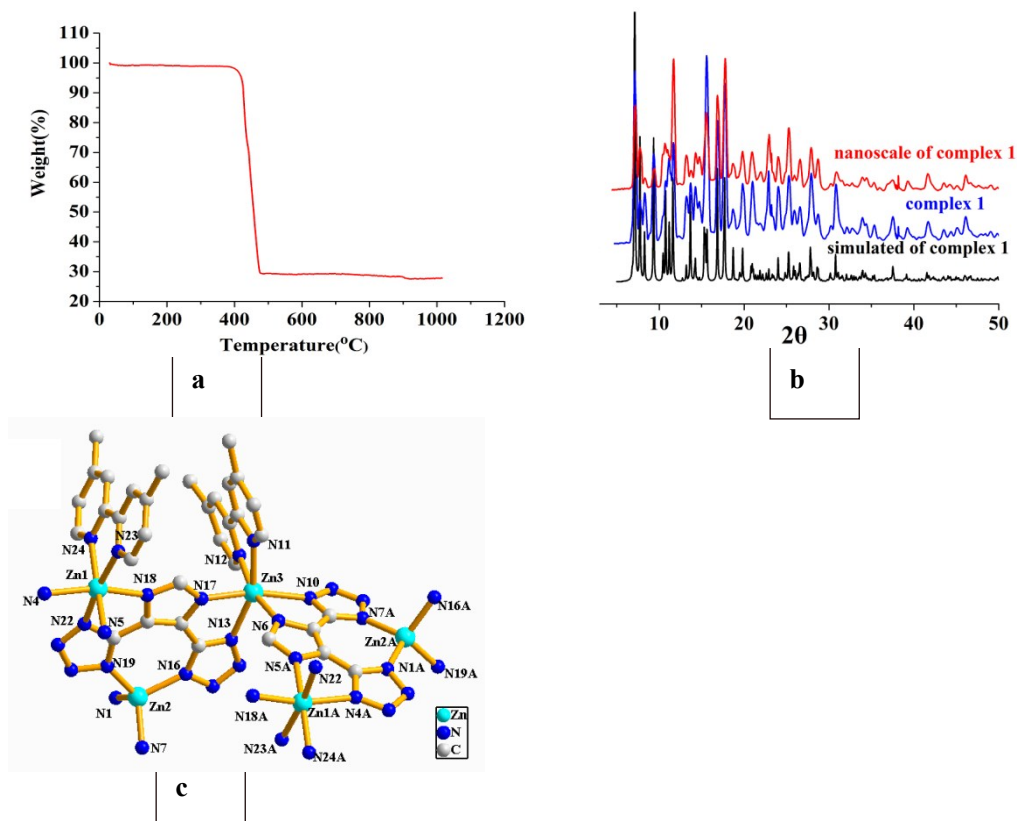

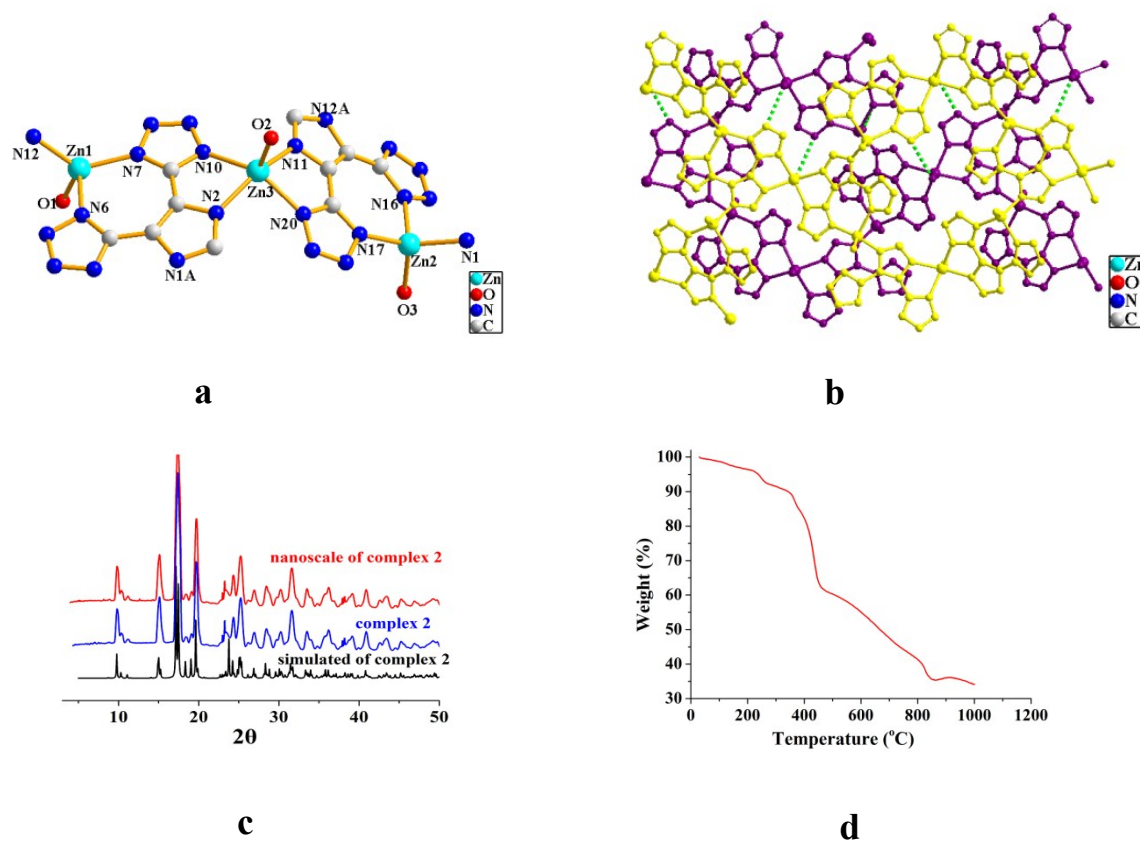

**Figure S2.** Crystal structure of **2**: (a) Coordination environments of the Zn<sup>II</sup> ions. Hydrogen atoms and water molecule are omitted for clarity. (b) View of the 3D supermolecule framework through hydrogen bonding interactions. (c) A comparison of PXRD results of simulated, synthesized, and nanoscale crystals of **2**. (d) The TG curve of **2**.

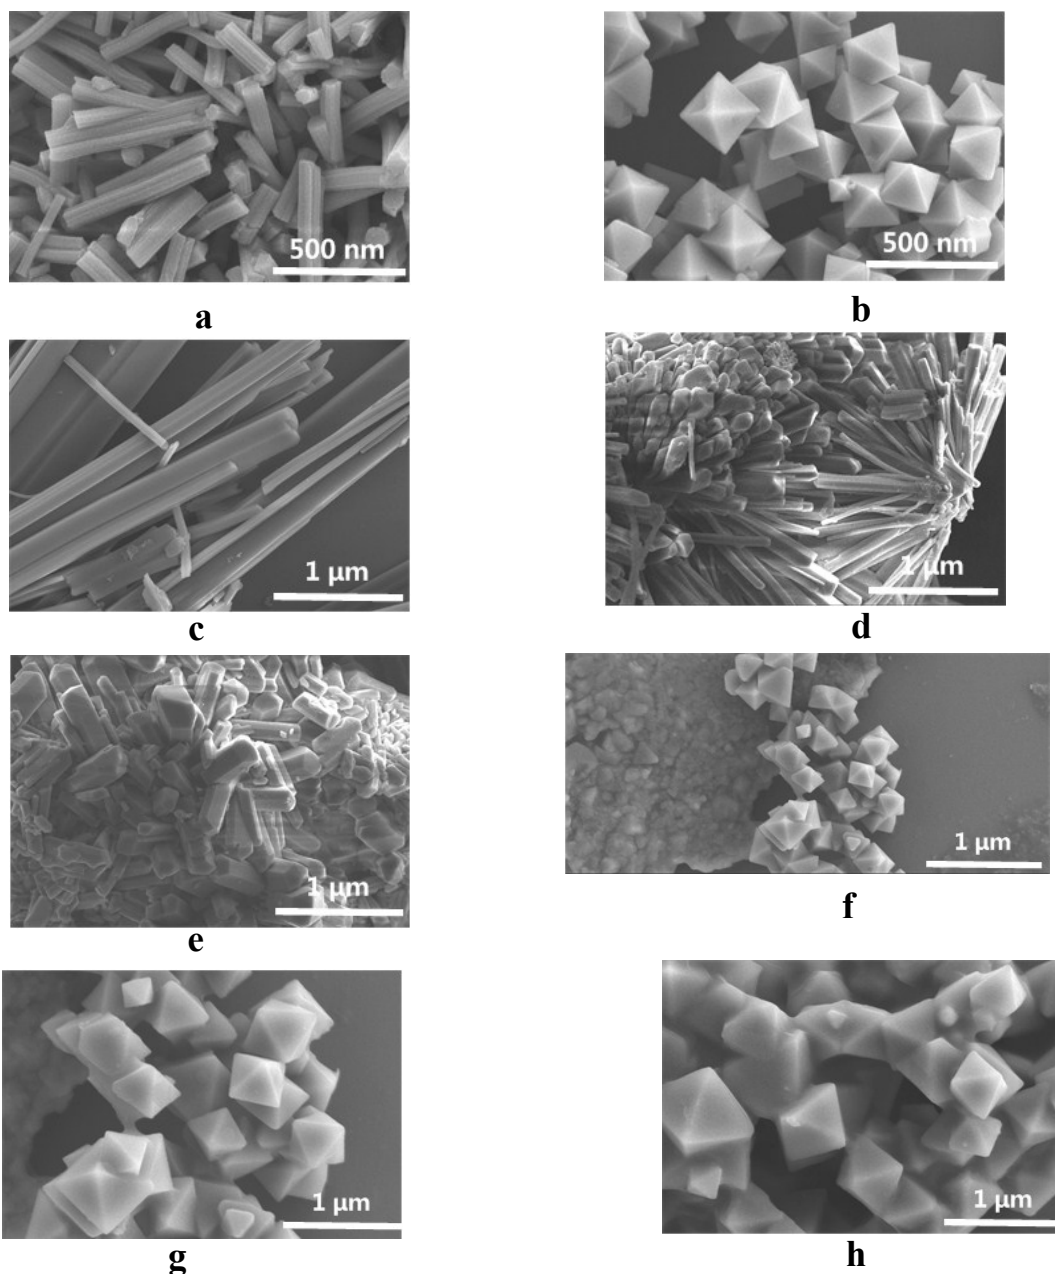

**Figure S3.** (a) SEM images for the morphologies and particle sizes of **1** induced by PVA with various magnifications. (b) SEM images for the morphologies and particle sizes of **2** induced by PVA with various magnifications. (c) SEM images for the morphologies and particle sizes of **1** induced by PVA with concentrations of 0.05 g. (d) SEM images for the morphologies and particle sizes of **1** induced by PVA with concentrations of 0.10 g. (e) SEM images for the morphologies and particle sizes of **1** induced by PVA with concentrations of 0.20 g. (f) SEM images for the morphologies and particle sizes of **2** induced by PVA with concentrations of 0.05 g. (g) SEM images for the morphologies and particle sizes of **2** induced by PVA with concentrations of 0.10 g. (h) SEM images for the morphologies and particle sizes of **2** induced by PVA with concentrations of 0.20 g.

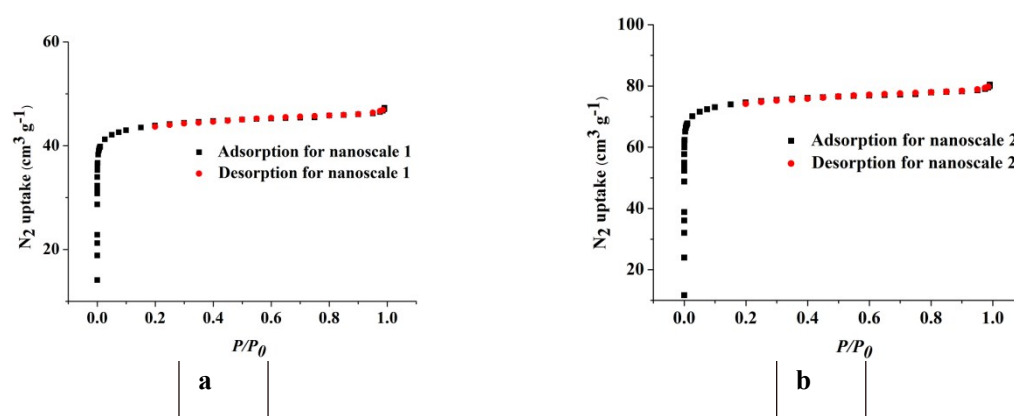

**Figure S4.** Crystal structure of **1**: (a) N<sub>2</sub> adsorption isotherm of nanoscale **1** at 77 K. (b) N<sub>2</sub> adsorption isotherm of nanoscale **2** at 77 K.

## 6. Optimization of reaction conditions for the conversion of nitromethylbenzene into benzoic acid<sup>[a]</sup>.

**Table S3.** Optimization of reaction conditions for the conversion of nitromethylbenzene into benzoic acid<sup>[a]</sup>.

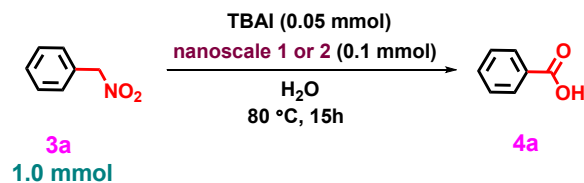

| Entry | Catalyst/mmol | Solvent            | Temperature/°C | Yield (%) <b>4a</b> <sup>[b]</sup> |
|-------|---------------|--------------------|----------------|------------------------------------|
| 1     | 1/0.1 mmol    | toluene            | 80             | 53                                 |
|       | 2/0.1 mmol    |                    |                | 68                                 |
| 2     | 1/0.1 mmol    | H <sub>2</sub> O   | 80             | 82                                 |
|       | 2/0.1 mmol    |                    |                | 94                                 |
| 3     | 1/0.1 mmol    | CH <sub>3</sub> CN | 80             | 59                                 |
|       | 2/0.1 mmol    |                    |                | 71                                 |
| 4     | 1/0.1 mmol    | DMF                | 80             | n.o. <sup>[c]</sup>                |
|       | 2/0.1 mmol    |                    |                | n.o.                               |
| 5     | 1/0.1 mmol    | EtOH               | 78             | n.o.                               |
|       | 2/0.1 mmol    |                    |                | n.o.                               |
| 6     | 1/0.1 mmol    | CHCl <sub>3</sub>  | 62             | n.o.                               |
|       | 2/0.1 mmol    |                    |                | n.o.                               |
| 7     | 1/0.1 mmol    | H <sub>2</sub> O   | 25             | < 10                               |
|       | 2/0.1 mmol    |                    |                | < 10                               |
| 8     | 1/0.1 mmol    | H <sub>2</sub> O   | 110            | 85                                 |
|       | 2/0.1 mmol    |                    |                | 96                                 |
| 9     | 1/0.1 mmol    | H <sub>2</sub> O   | 80             | 87 <sup>[d]</sup>                  |
|       | 2/0.1 mmol    |                    |                | 95 <sup>[d]</sup>                  |
| 10    | 1/0.01 mmol   | H <sub>2</sub> O   | 80             | 51                                 |
|       | 2/0.01 mmol   |                    |                | 56                                 |
| 11    | 1/0.05 mmol   | H <sub>2</sub> O   | 80             | 69                                 |

|    |                                   |                  |    |    |
|----|-----------------------------------|------------------|----|----|
|    | <b>2</b> /0.05 mmol               |                  |    | 71 |
| 12 | <b>1</b> /0.15 mmol               | H <sub>2</sub> O | 80 | 84 |
|    | <b>2</b> /0.15 mmol               |                  |    | 96 |
| 13 | <b>1</b> /0.2 mmol                | H <sub>2</sub> O | 80 | 86 |
|    | <b>2</b> /0.2 mmol                |                  |    | 97 |
| 14 | Zn(OTf) <sub>2</sub> /0.1<br>mmol | H <sub>2</sub> O | 80 | 36 |

<sup>a</sup>Reaction conditions: **3a-i** (1.0 mmol), TBAI (0.05 mmol), nanoscale catalysts **1** and **2** (0.1 mmol), H<sub>2</sub>O (10 mL), AcOH (60  $\mu$ L), 80 °C (15 h). <sup>b</sup>Isolated yield after 15 h. <sup>c</sup>Not observed = n.o. <sup>d</sup>Isolated yield of after 24 h.

**7. Conversion of nitrobenzyl compounds into benzoic acids frameworks catalyzed by large size of 1-2, Zn(NO<sub>3</sub>)<sub>2</sub>/H<sub>3</sub>idbt and H<sub>3</sub>idbt in water.**

**Table S4.** Conversion of nitrobenzyl compounds into benzoic acids frameworks catalyzed by large size of **1** and **2** under H<sub>2</sub>O.<sup>a</sup>

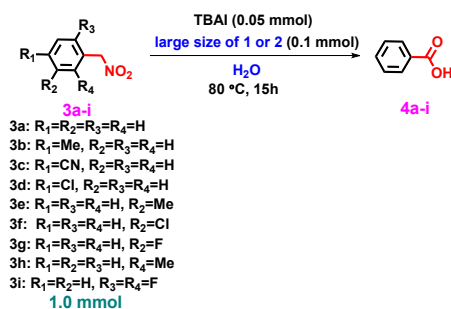

| Entry | Catalysts/mmol                                                | Nitrobenzyl   | Yield % of <b>4a-i</b> <sup>b</sup> |
|-------|---------------------------------------------------------------|---------------|-------------------------------------|
| 1     | <b>1</b> /0.1 mmol                                            | <br><b>3a</b> | 56                                  |
| 2     | <b>2</b> /0.1 mmol                                            |               | 67                                  |
| 3     | Zn(OTf) <sub>2</sub> /H <sub>3</sub> idbt/(0.1 mmol/0.1 mmol) |               | 45                                  |
| 4     | H <sub>3</sub> idbt/0.1 mmol                                  |               | n.o. <sup>c</sup>                   |
| 5     | <b>1</b> /0.1 mmol                                            | <br><b>3b</b> | 56                                  |
| 6     | <b>2</b> /0.1 mmol                                            |               | 66                                  |
| 7     | Zn(OTf) <sub>2</sub> /H <sub>3</sub> idbt/(0.1 mmol/0.1 mmol) |               | 45                                  |
| 8     | H <sub>3</sub> idbt/0.1 mmol                                  |               | n.o.                                |
| 9     | <b>1</b> /0.1 mmol                                            | <br><b>3c</b> | 54                                  |
| 10    | <b>2</b> /0.1 mmol                                            |               | 63                                  |
| 11    | Zn(OTf) <sub>2</sub> /H <sub>3</sub> idbt/(0.1 mmol/0.1 mmol) |               | 43                                  |
| 12    | H <sub>3</sub> idbt/0.1 mmol                                  |               | n.o.                                |
| 13    | <b>1</b> /0.1 mmol                                            | <br><b>3d</b> | 53                                  |
| 14    | <b>2</b> /0.1 mmol                                            |               | 93                                  |
| 15    | Zn(OTf) <sub>2</sub> /H <sub>3</sub> idbt/(0.1 mmol/0.1 mmol) |               | 43                                  |
| 16    | H <sub>3</sub> idbt/0.1 mmol                                  |               | n.o.                                |
| 17    | <b>1</b> /0.1 mmol                                            | <br><b>3e</b> | 53                                  |
| 18    | <b>2</b> /0.1 mmol                                            |               | 63                                  |
| 19    | Zn(OTf) <sub>2</sub> /H <sub>3</sub> idbt/(0.1 mmol/0.1 mmol) |               | 42                                  |
| 20    | H <sub>3</sub> idbt/0.1 mmol                                  |               | n.o.                                |
| 21    | <b>1</b> /0.1 mmol                                            | <br><b>3f</b> | 51                                  |
| 22    | <b>2</b> /0.1 mmol                                            |               | 62                                  |

|    |                                                               |                                                                                         |      |
|----|---------------------------------------------------------------|-----------------------------------------------------------------------------------------|------|
| 23 | Zn(OTf) <sub>2</sub> /H <sub>3</sub> idbt/(0.1 mmol/0.1 mmol) |                                                                                         | 39   |
| 24 | H <sub>3</sub> idbt/0.1 mmol                                  |                                                                                         | n.o. |
| 25 | <b>1</b> /0.1 mmol                                            | 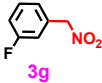<br>3g | 50   |
| 26 | <b>2</b> /0.1 mmol                                            |                                                                                         | 59   |
| 27 | Zn(OTf) <sub>2</sub> /H <sub>3</sub> idbt/(0.1 mmol/0.1 mmol) |                                                                                         | 36   |
| 28 | H <sub>3</sub> idbt/0.1 mmol                                  | 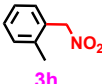<br>3h | n.o. |
| 29 | <b>1</b> /0.1 mmol                                            |                                                                                         | 49   |
| 30 | <b>2</b> /0.1 mmol                                            |                                                                                         | 57   |
| 31 | Zn(OTf) <sub>2</sub> /H <sub>3</sub> idbt/(0.1 mmol/0.1 mmol) |                                                                                         | 33   |
| 32 | H <sub>3</sub> idbt/0.1 mmol                                  | 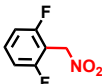<br>3i | n.o. |
| 33 | <b>1</b> /0.1 mmol                                            |                                                                                         | 45   |
| 34 | <b>2</b> /0.1 mmol                                            |                                                                                         | 55   |
| 35 | Zn(OTf) <sub>2</sub> /H <sub>3</sub> idbt/(0.1 mmol/0.1 mmol) |                                                                                         | 31   |
| 36 | H <sub>3</sub> idbt/0.1 mmol                                  |                                                                                         | n.o. |

<sup>a</sup>Reaction conditions: **3a-i** (1.0 mmol), TBAI (0.05 mmol), large size of **1** and **2** (0.1 mmol) or Zn(NO<sub>3</sub>)<sub>2</sub>/H<sub>3</sub>idbt (0.1 mmol/0.1 mmol) or H<sub>3</sub>idbt (0.1 mmol), H<sub>2</sub>O (10 mL), AcOH (60 μL) 80 °C (15 h). <sup>b</sup>Isolated yield after 15 h. <sup>c</sup>Not observed = n.o.

8. A plausible mechanism for the conversion of nitroalkanes into carboxylic acids.

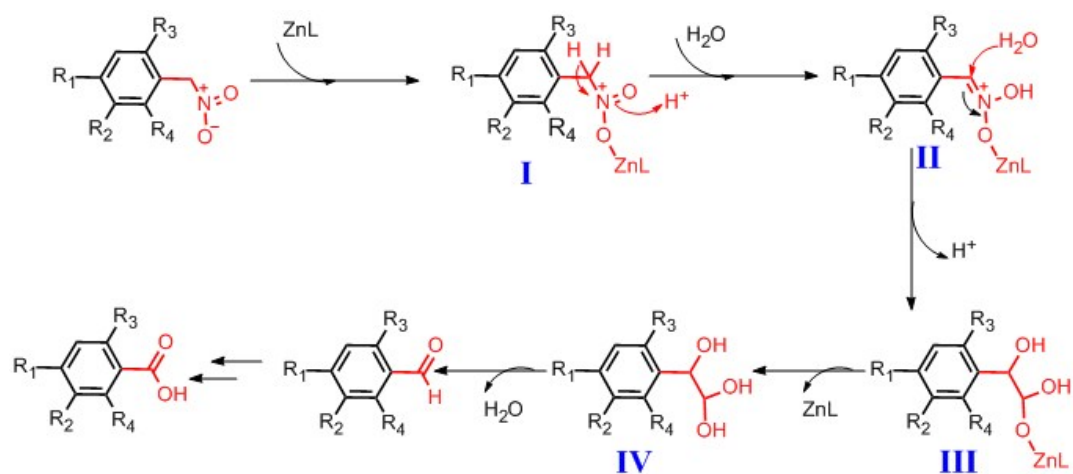

**Scheme S1.** A plausible mechanism for the conversion of nitroalkanes into carboxylic acids.

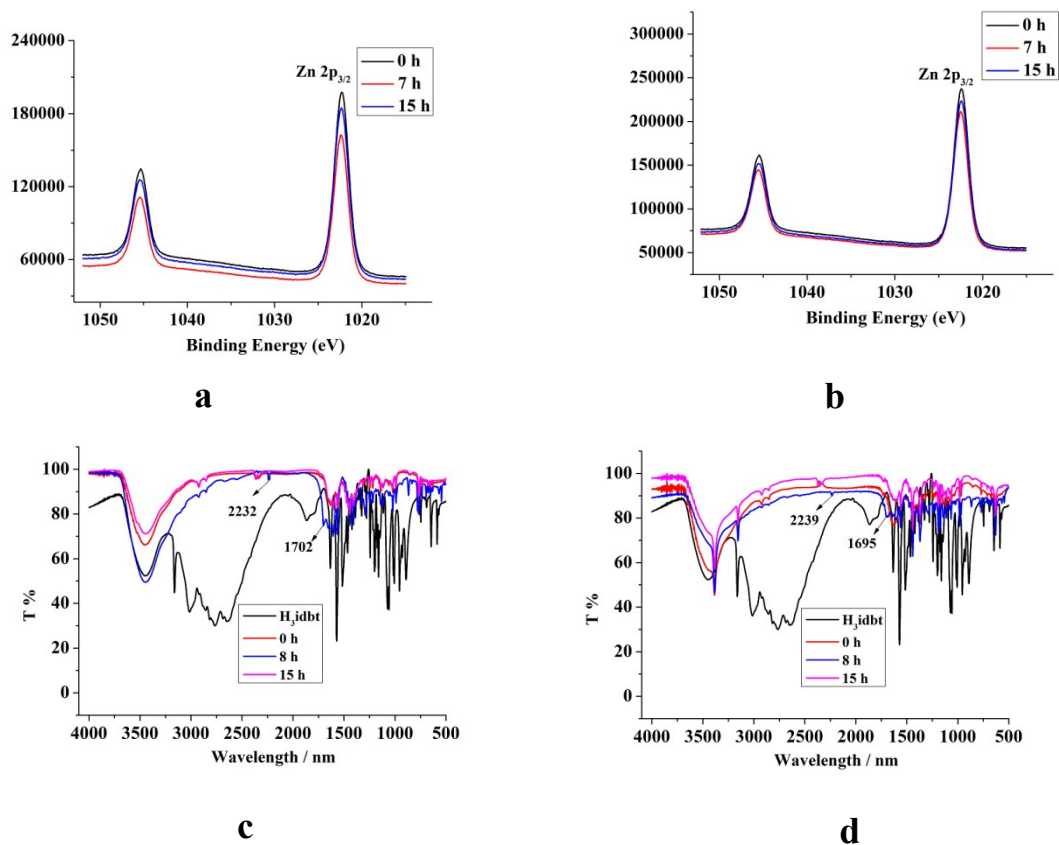

**Figure S5.** (a) XPS spectrum of Zn<sup>II</sup> ions in **1** during different reaction times (0, 7, and 15 h). (b) XPS spectrum of Zn<sup>II</sup> ions in **2** during different reaction times (0, 7, and 15 h). (c) The distinct characteristic absorption peak of NC group in FTIR spectrum changed on nanoscale **1** during the different reaction times (0, 8, and 15 h). (d) The distinct characteristic absorption peak of NC group in FTIR spectrum changed on nanoscale **2** during the different reaction times (0, 8, and 15 h).

## 9. Recycling test for conversion reactions with nanoscale 1 and 2.

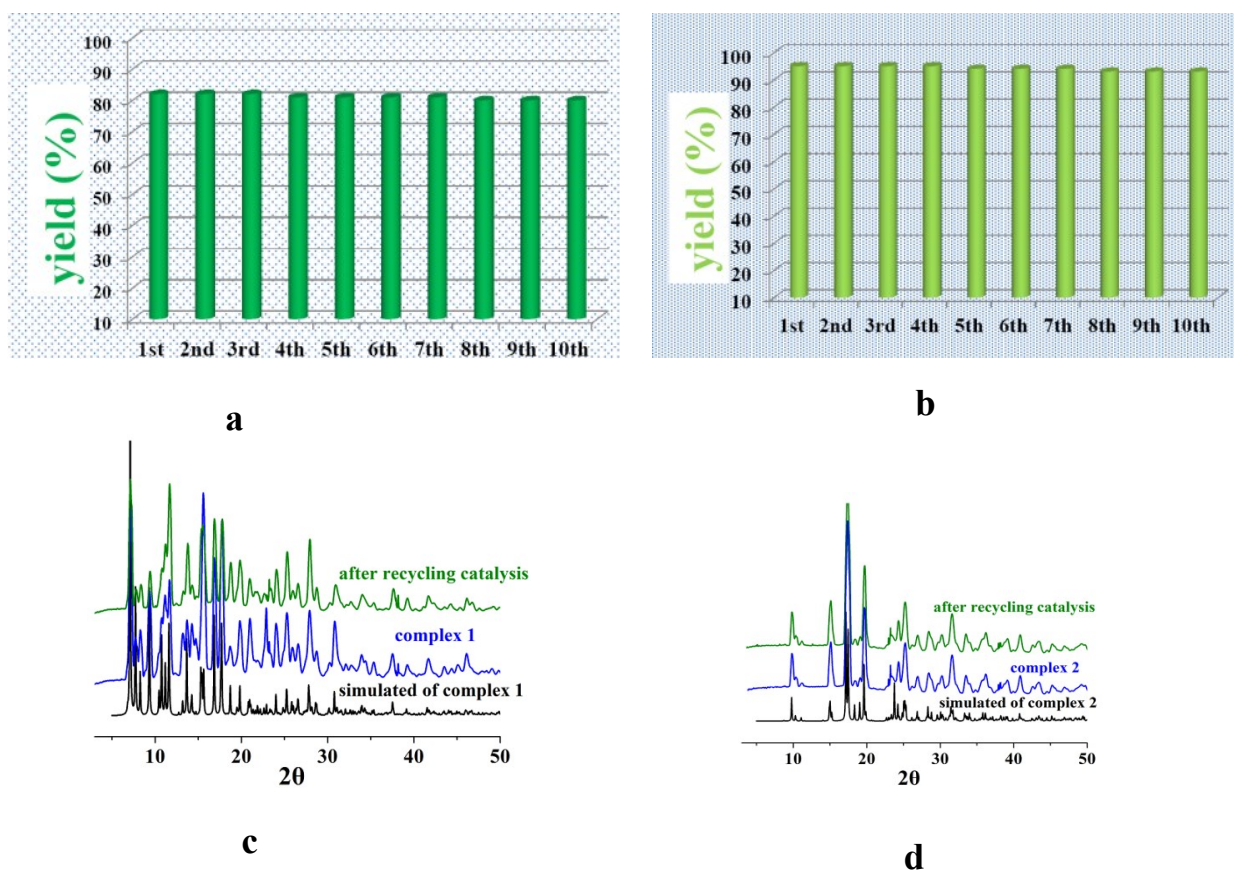

**Figure S6.** (a) Recycling test for conversion reaction with nanoscale **1**. (b) Recycling test for conversion reaction with nanoscale **2**. (c) Comparison of the PXRD patterns of nanoscale **1** before and after catalysis. (d) Comparison of the PXRD patterns of nanoscale **2** before and after catalysis.

## 10. Spectral copies of MS and $^1\text{H}$ NMR of compounds obtained in this study.

GXQ1115C #4-6 RT: 0.04-0.07 AV: 3 NL: 5.78E3  
T: ITMS - c ESI Full ms [80.00-1500.00]

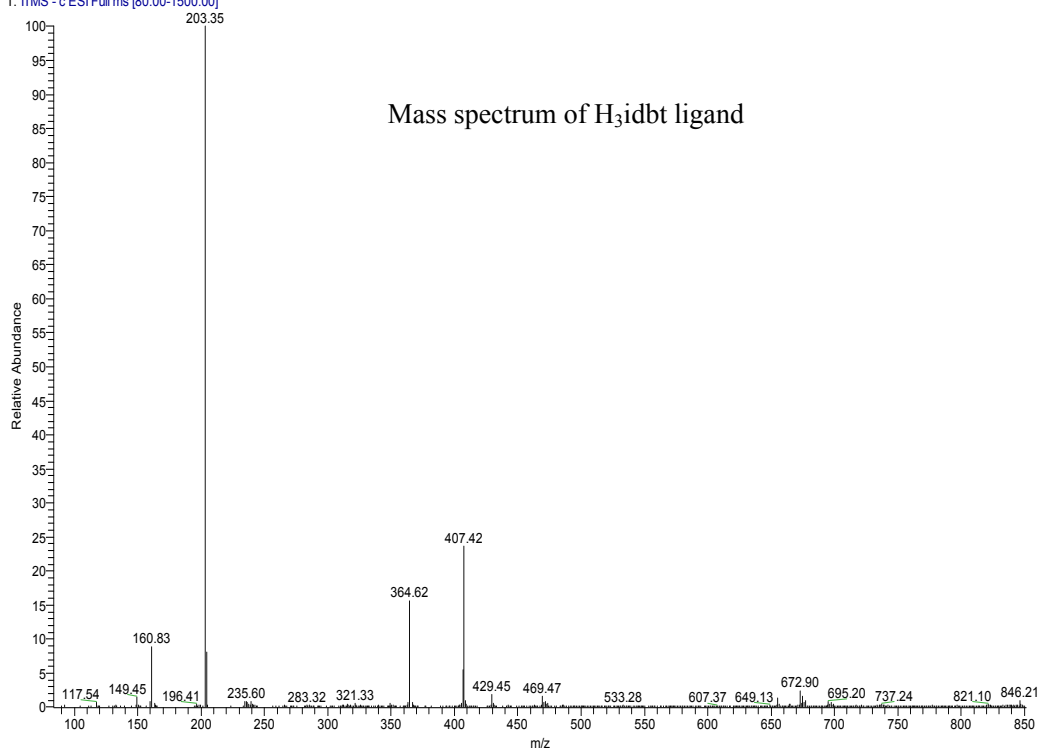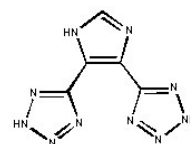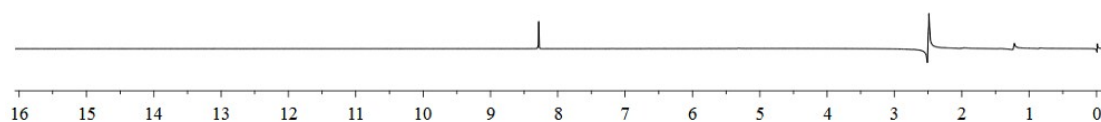

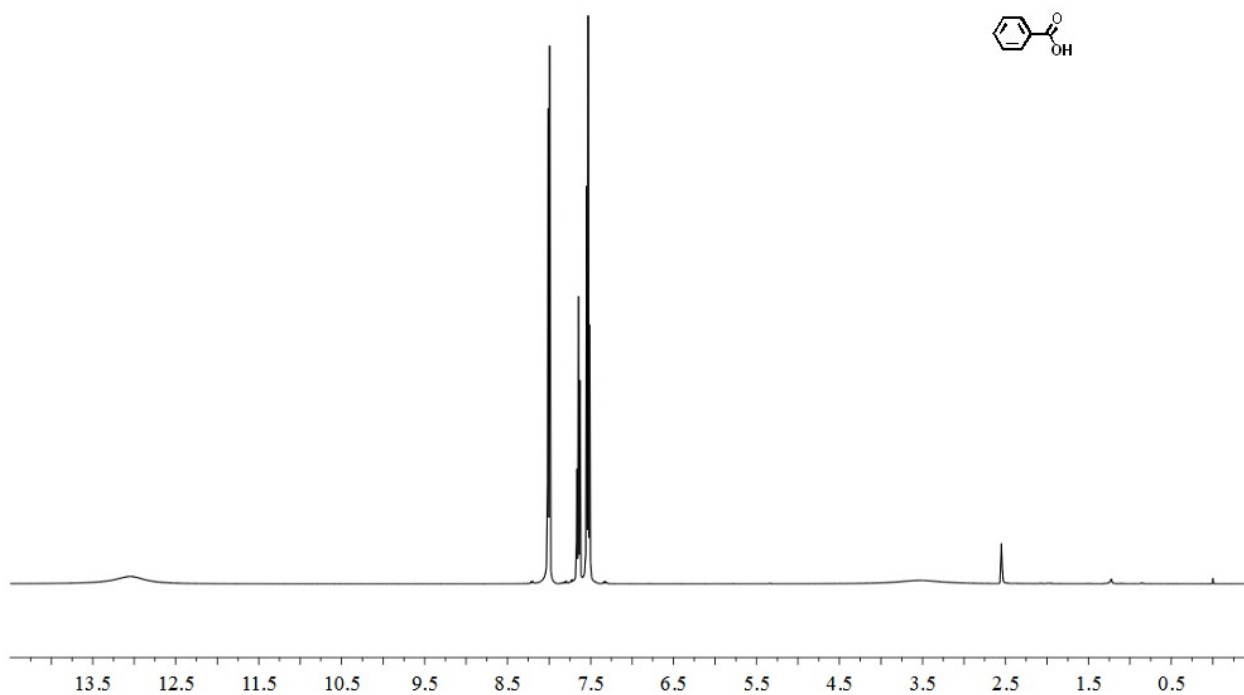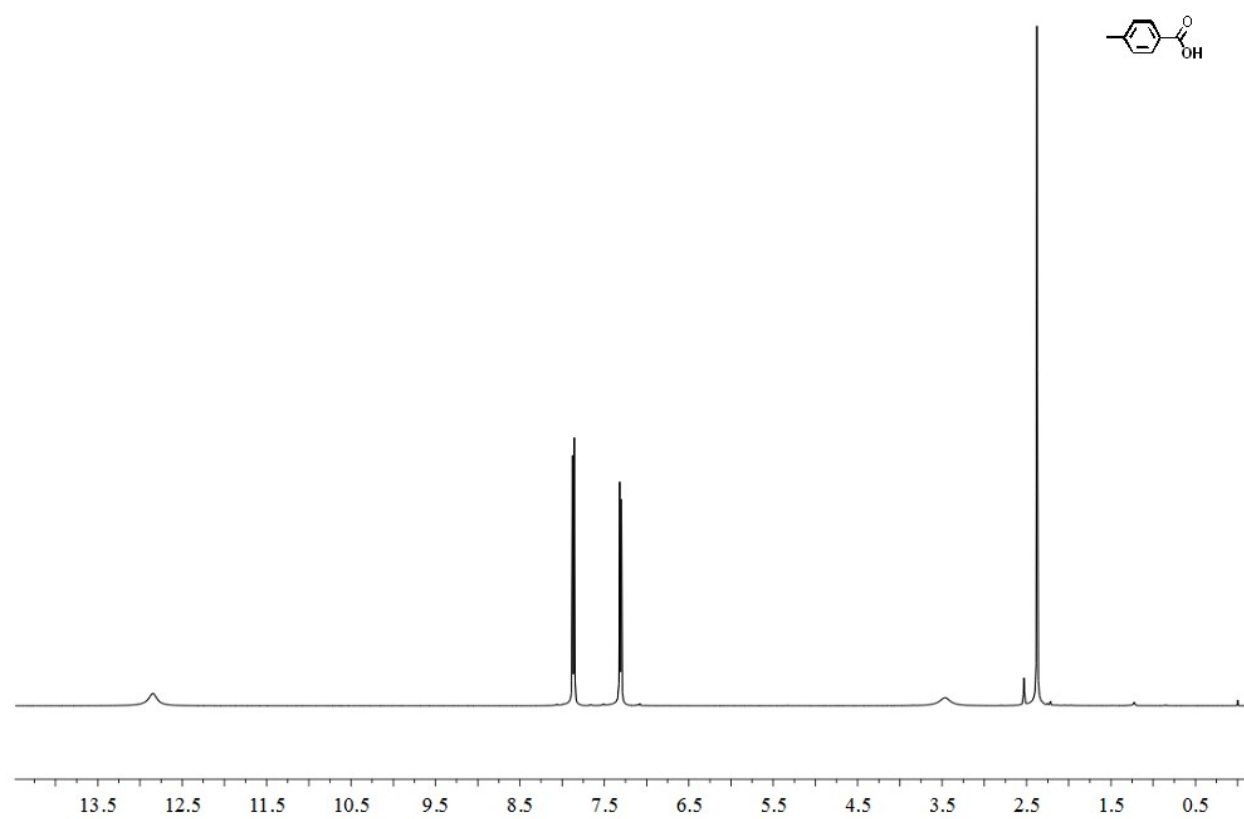

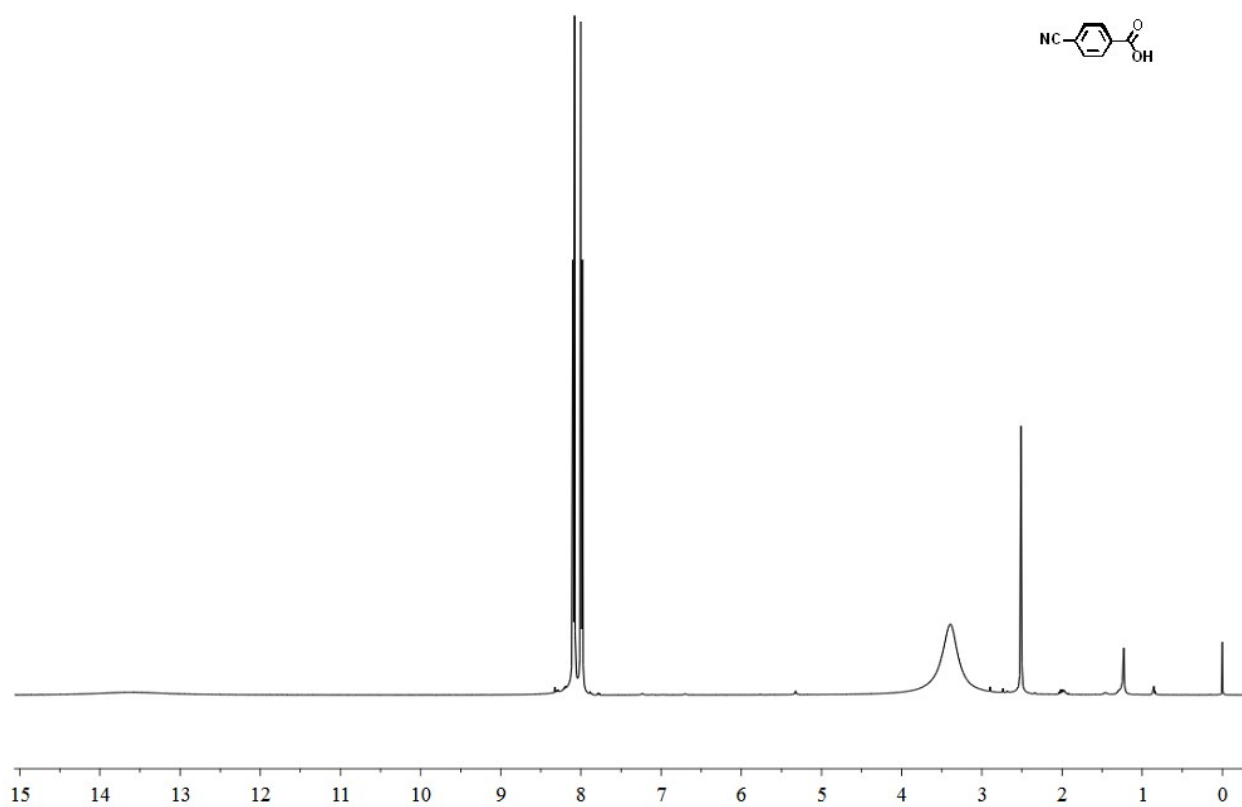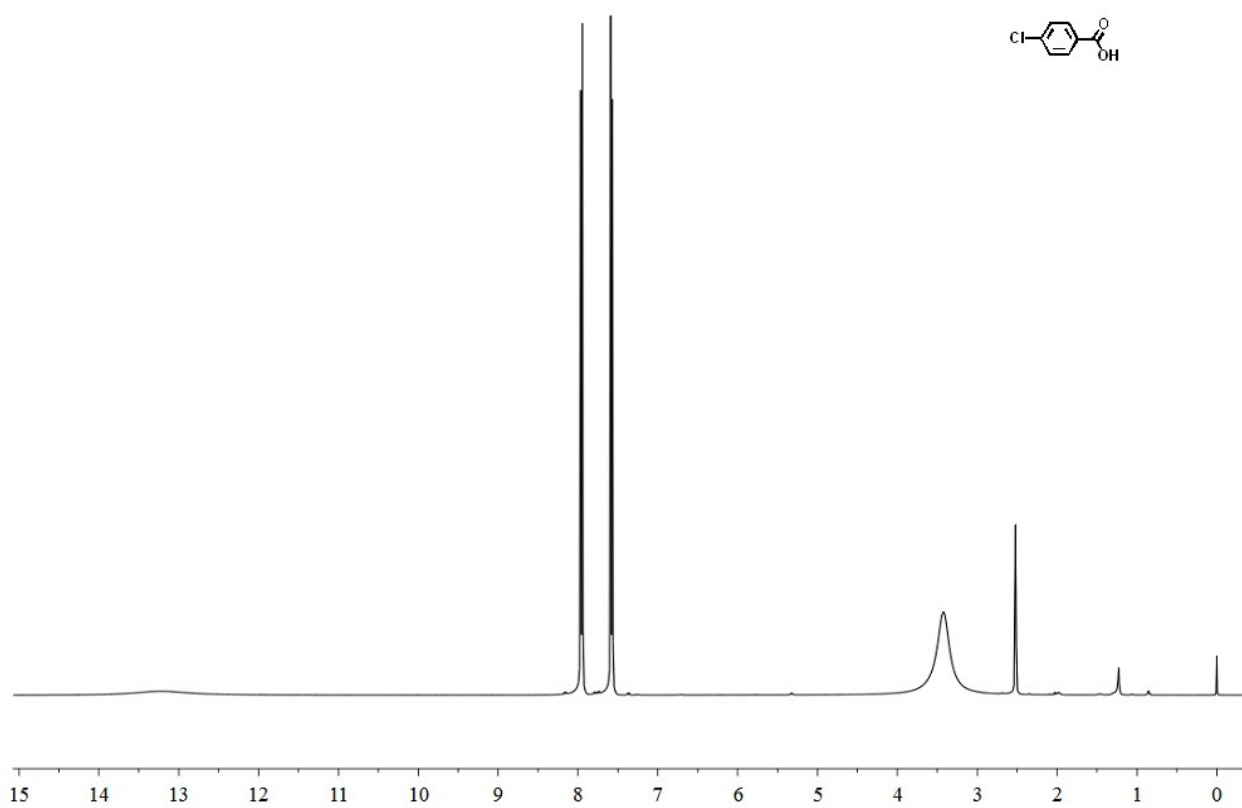

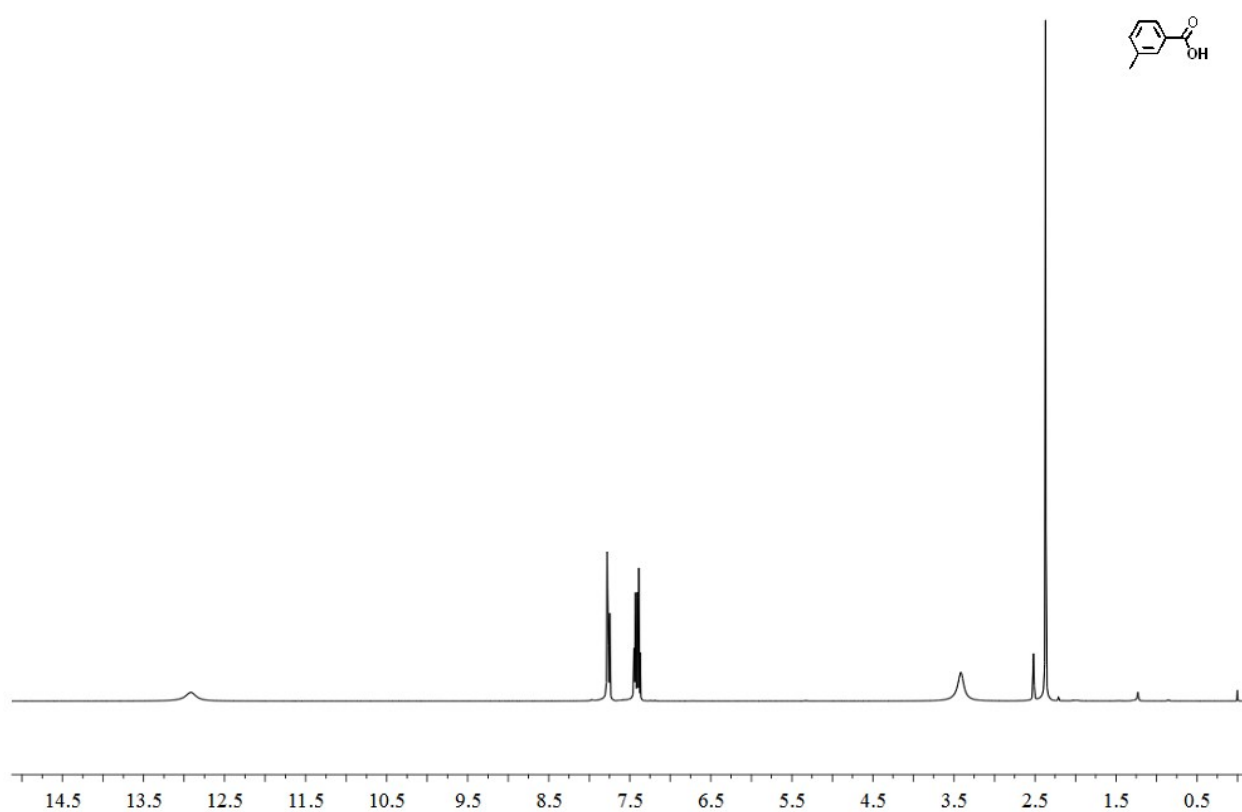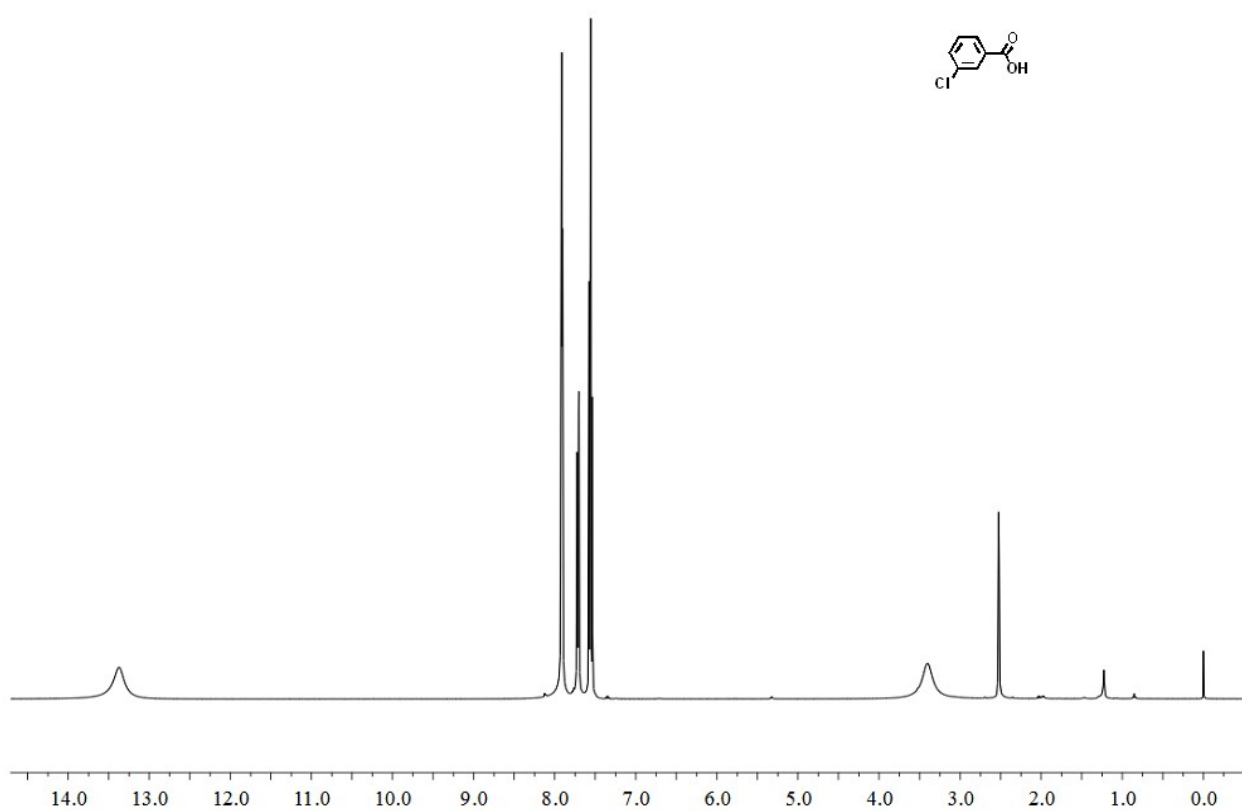

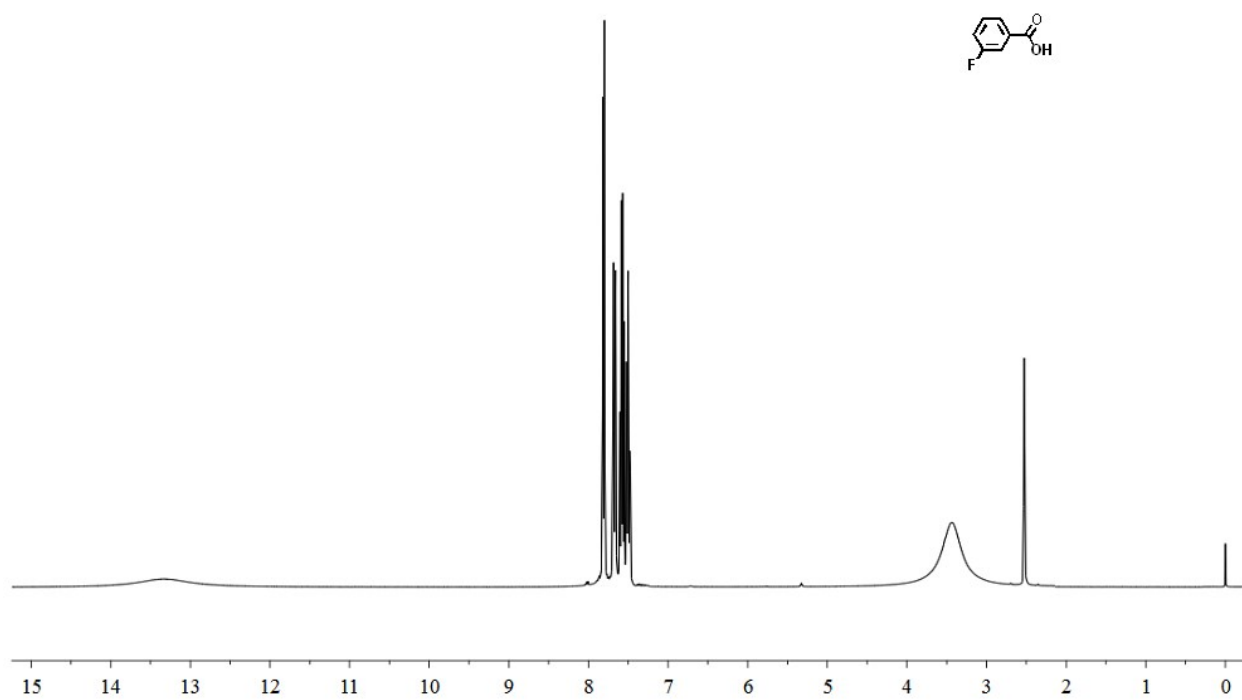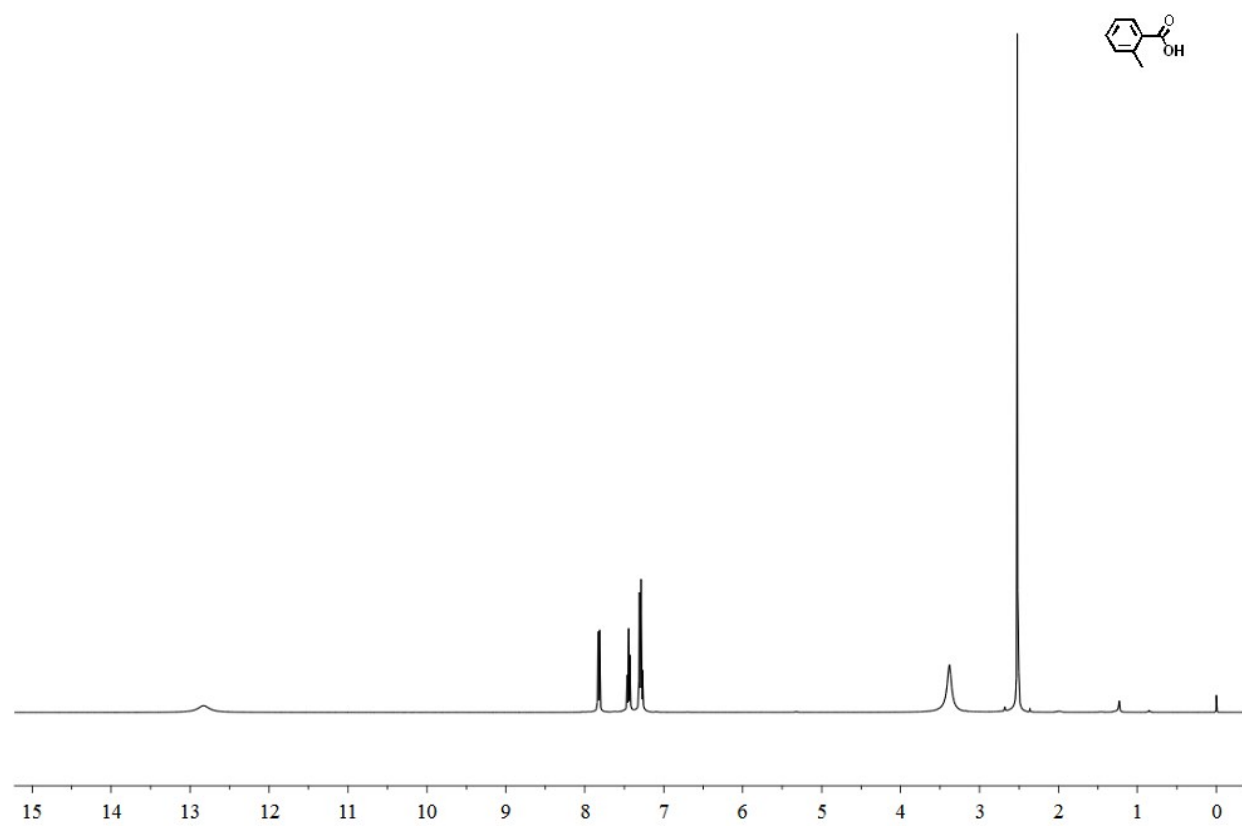

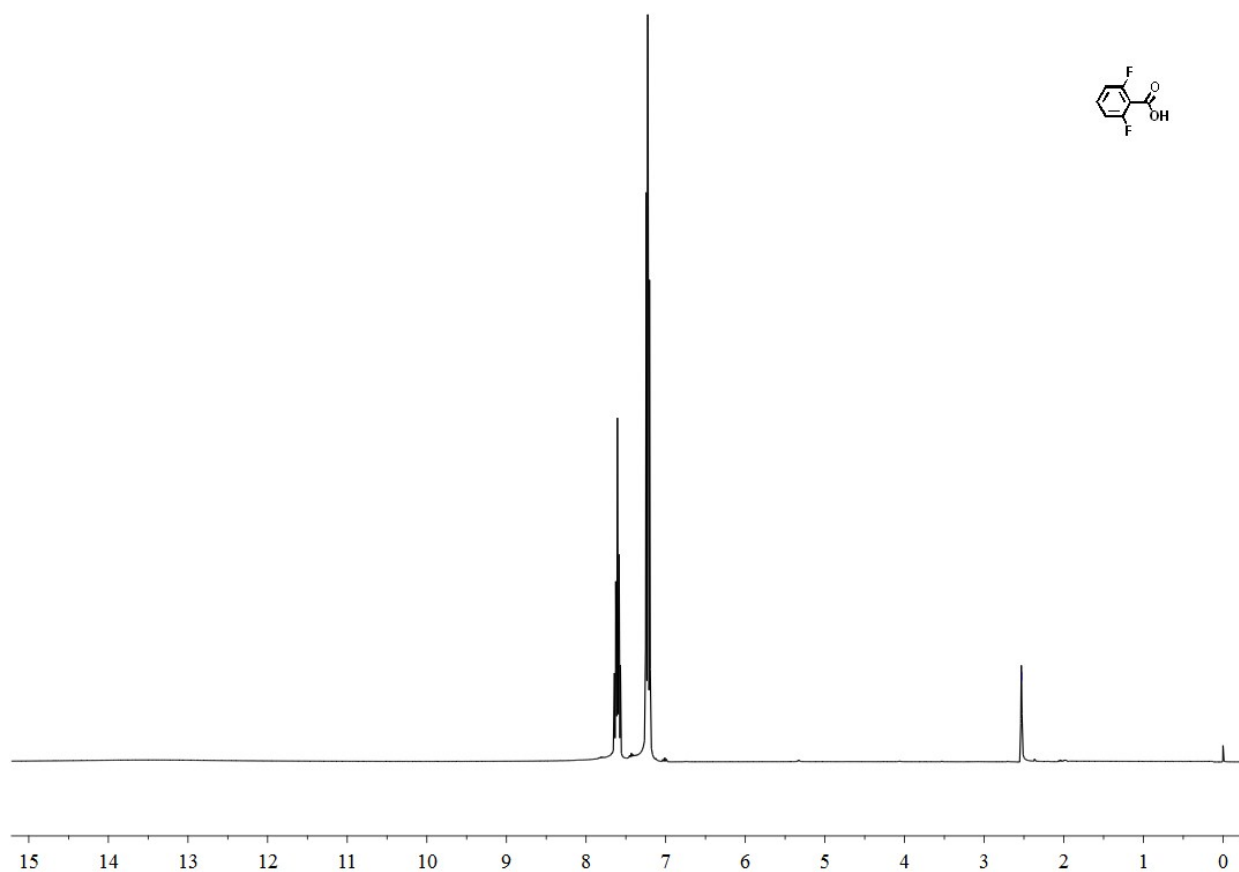

## 11. References

- (1) J. Wang, C. Huang, K. Gao, X. Wang, M. Liu, H. Ma, J. Wu, H. Hou, *Chem. Asian J.*, 2016, **11**, 1856-1862.
- (2) P. Marcé, J. Lynch, A. J. Blacker, J. M. J. Williams, *Chem. Commun.*, 2016, **52**, 1013-1016.
- (3) G. M. Sheldrick, A short history of *SHELX*. *Acta Crystallogr., Sect. A: Found. Crystallogr.*, 2008, **A64**, 112-122.
- (4) G. M. Sheldrick, *Acta Cryst.*, 2015, **C71**, 3-8.
- (5) G. M. Sheldrick, SHELXS 97, Program for the Refinement of Crystal Structures; University of Göttingen, Germany, 1997.
